# Supplementary material
Source: HighWire-hosted journal article supplement (https://bjo.bmj.com/content/bjophthalmol-2017-311258)
Supplement: inline-supplementary-material-1 [file inline-supplementary-material-1.xlsx]

## Sheet: Table 1 All Ages
			CRUDE PREVALENCE (%)																											AGE-STANDARDISED PREVALENCE (%)
			ALL CAUSES COMBINED	ALL CAUSES COMBINED	ALL CAUSES COMBINED	CATARACT	CATARACT	CATARACT	DIABETIC RETINOPATHY	DIABETIC RETINOPATHY	DIABETIC RETINOPATHY	AGE-RELATED MACULAR DEGENERATION	AGE-RELATED MACULAR DEGENERATION	AGE-RELATED MACULAR DEGENERATION	OTHER	OTHER	OTHER	GLAUCOMA	GLAUCOMA	GLAUCOMA	UNCORRECTED REFRACTIVE ERROR	UNCORRECTED REFRACTIVE ERROR	UNCORRECTED REFRACTIVE ERROR	CORNEAL OPACITY	CORNEAL OPACITY	CORNEAL OPACITY	TRACHOMA	TRACHOMA	TRACHOMA	ALL CAUSES COMBINED	ALL CAUSES COMBINED	ALL CAUSES COMBINED	CATARACT	CATARACT	CATARACT	DIABETIC RETINOPATHY	DIABETIC RETINOPATHY	DIABETIC RETINOPATHY	AGE-RELATED MACULAR DEGENERATION	AGE-RELATED MACULAR DEGENERATION	AGE-RELATED MACULAR DEGENERATION	OTHER	OTHER	OTHER	GLAUCOMA	GLAUCOMA	GLAUCOMA	UNCORRECTED REFRACTIVE ERROR	UNCORRECTED REFRACTIVE ERROR
GBD REGION	year	level	Prevalence	10% Uncertainty Interval	90% Uncertainty Interval	Prevalence	10% Uncertainty Interval	90% Uncertainty Interval	Prevalence	10% Uncertainty Interval	90% Uncertainty Interval	Prevalence	10% Uncertainty Interval	90% Uncertainty Interval	Prevalence	10% Uncertainty Interval	90% Uncertainty Interval	Prevalence	10% Uncertainty Interval	90% Uncertainty Interval	Prevalence	10% Uncertainty Interval	90% Uncertainty Interval	Prevalence	10% Uncertainty Interval	90% Uncertainty Interval	Prevalence	10% Uncertainty Interval	90% Uncertainty Interval	Prevalence	10% Uncertainty Interval	90% Uncertainty Interval	Prevalence	10% Uncertainty Interval	90% Uncertainty Interval	Prevalence	10% Uncertainty Interval	90% Uncertainty Interval	Prevalence	10% Uncertainty Interval	90% Uncertainty Interval	Prevalence	10% Uncertainty Interval	90% Uncertainty Interval	Prevalence	10% Uncertainty Interval	90% Uncertainty Interval	Prevalence	10% Uncertainty Interval
Asia Pacific, High Income	1990	blind	0.22393	0.1184	0.358879	0.0527241	0.0207402	0.106985	0.0072259	0.00081182	0.0243381	0.0410221	0.00823032	0.116743	0.0541969	0.0124553	0.144808	0.0307999	0.00669746	0.0846321	0.0293622	0.0134684	0.0531769	0.00755848	0.000396218	0.0292417	0	0	0	0.187619	0.0992042	0.300644	0.0445226	0.0174735	0.0903862	0.00612967	0.000675716	0.0207554	0.0342817	0.00683352	0.0977772	0.0458767	0.0105589	0.122353	0.0255076	0.00550363	0.0702783	0.0245867	0.0112762
Asia Pacific, High Income	1995	blind	0.23352	0.127662	0.365637	0.0536859	0.0216251	0.10703	0.00809558	0.000939895	0.0267395	0.0422589	0.00875716	0.118134	0.0591184	0.0140076	0.154543	0.0318845	0.00717653	0.0856449	0.0306332	0.0145338	0.0541858	0.007143	0.000388528	0.026856	0	0	0	0.166236	0.090746	0.260541	0.0377883	0.0151603	0.0755048	0.00596986	0.000675888	0.0198972	0.0294222	0.00596998	0.082996	0.0426914	0.010144	0.111374	0.0225923	0.00504519	0.0608562	0.0218239	0.0103379
Asia Pacific, High Income	2000	blind	0.242972	0.136243	0.374061	0.0531985	0.021512	0.105852	0.00916327	0.00104055	0.030358	0.043776	0.00911315	0.121717	0.0646264	0.0157639	0.165707	0.0329744	0.00747329	0.0877031	0.0318943	0.015521	0.0554657	0.00681405	0.000370227	0.0250377	0	0	0	0.145478	0.0812959	0.224441	0.0310223	0.0124768	0.0619061	0.00594322	0.000659426	0.0198997	0.0250529	0.00504119	0.0707315	0.0388241	0.00944275	0.0996984	0.0196599	0.00441034	0.0525308	0.0191345	0.00927958
Asia Pacific, High Income	2005	blind	0.258445	0.144119	0.396839	0.0545033	0.0212375	0.110294	0.0102908	0.00106315	0.0347814	0.0461353	0.00907607	0.130158	0.0712137	0.0172407	0.182089	0.0350861	0.00764659	0.094366	0.0339378	0.0164161	0.0588641	0.00677361	0.000346142	0.0249207	0	0	0	0.12918	0.0716414	0.198967	0.0258003	0.00997069	0.0524393	0.00590236	0.000602384	0.0201805	0.0213536	0.00398747	0.0615645	0.0357279	0.00862393	0.0915904	0.0173296	0.00371604	0.0469488	0.0170167	0.00818649
Asia Pacific, High Income	2010	blind	0.284758	0.155814	0.439824	0.0592467	0.0217514	0.123634	0.0110619	0.000989859	0.0384988	0.0484073	0.00851924	0.142104	0.0824354	0.0195423	0.212135	0.0386418	0.00783116	0.106849	0.0373898	0.0177442	0.0652408	0.00705816	0.000327484	0.0263324	0	0	0	0.120389	0.0653672	0.186861	0.0233585	0.0084955	0.0490047	0.00565066	0.000503848	0.0199913	0.0183291	0.00301167	0.0552462	0.0350715	0.00828471	0.0906094	0.0161659	0.0032145	0.0450832	0.0158715	0.00747425
Asia Pacific, High Income	2015	blind	0.302537	0.158576	0.476221	0.0609095	0.0203403	0.133663	0.0121431	0.000888115	0.0446278	0.049871	0.00757196	0.154277	0.0915681	0.0207993	0.23995	0.0406679	0.00725856	0.11765	0.0397286	0.0180525	0.0706446	0.00725189	0.00028654	0.0278511	0	0	0	0.109992	0.0571193	0.174061	0.0202237	0.00669297	0.0446484	0.00564867	0.000421501	0.0211011	0.0158235	0.00222047	0.0502998	0.0333619	0.00753889	0.0878753	0.0147806	0.00259815	0.0430922	0.0145142	0.00653521
Asia Pacific, High Income	2020	blind	0.306252	0.150515	0.490005	0.0574164	0.0169041	0.132625	0.0142314	0.000828936	0.0543896	0.0505967	0.00644479	0.16386	0.0955603	0.0203922	0.254038	0.0408033	0.00617452	0.123781	0.0402468	0.0171584	0.072729	0.00712891	0.000224414	0.0281427	0	0	0	0.0970451	0.0471914	0.156217	0.0161649	0.00470827	0.0375879	0.00592128	0.00036121	0.0230189	0.0137423	0.00160345	0.0457694	0.030023	0.00635535	0.0804387	0.0129693	0.0019345	0.0397173	0.0128219	0.0054084
Australasia	1990	blind	0.268372	0.119283	0.463237	0.0634489	0.0209777	0.138634	0.00837029	0.000784282	0.0303909	0.0505349	0.00864058	0.153927	0.0641759	0.0124018	0.184621	0.036588	0.00669632	0.108182	0.0350551	0.0135217	0.0683662	0.00913389	0.000398126	0.0382189	0	0	0	0.21213	0.0941513	0.36639	0.0492723	0.0162245	0.107905	0.00710799	0.00065551	0.0259331	0.0386028	0.00643864	0.118761	0.0512798	0.00992332	0.147309	0.0285207	0.0051593	0.0847025	0.0277437	0.0106852
Australasia	1995	blind	0.265596	0.119521	0.453827	0.0617988	0.0204989	0.134478	0.00844329	0.000785068	0.0305199	0.0484201	0.00828488	0.147617	0.0668918	0.0130647	0.190719	0.0360983	0.00669449	0.105843	0.0347129	0.0135586	0.0670048	0.00823372	0.000366595	0.0338111	0	0	0	0.19304	0.0866502	0.330181	0.0436841	0.0144167	0.095267	0.00678549	0.000626144	0.0246554	0.0333236	0.00549509	0.103148	0.0493482	0.00965628	0.14039	0.0259768	0.00476048	0.076446	0.0252896	0.00985243
Australasia	2000	blind	0.260643	0.117667	0.447102	0.058238	0.0189766	0.128962	0.00869763	0.000766471	0.0322931	0.0460145	0.00769423	0.142937	0.0698392	0.0137589	0.199167	0.0353916	0.00648254	0.104763	0.0340944	0.0133657	0.066057	0.00743232	0.000325314	0.0304224	0	0	0	0.174017	0.0782877	0.299044	0.0376893	0.0122212	0.0836189	0.00663432	0.000587656	0.0247297	0.0286249	0.00457828	0.0906372	0.0466271	0.00914491	0.133279	0.0233557	0.00422393	0.069484	0.0228361	0.00892135
Australasia	2005	blind	0.255972	0.114456	0.438594	0.0558091	0.0174584	0.12579	0.00908188	0.000719965	0.0345298	0.0438018	0.00679599	0.13915	0.0713602	0.0138441	0.203635	0.0348294	0.00608954	0.104512	0.0335125	0.0130149	0.0648707	0.00683999	0.000284159	0.0279706	0	0	0	0.157577	0.070157	0.270535	0.0326796	0.0101585	0.073854	0.00657098	0.000530141	0.0250944	0.0247017	0.00362408	0.0801338	0.0443697	0.00860973	0.126701	0.0212017	0.00365417	0.0639504	0.0207101	0.00800807
Australasia	2010	blind	0.248694	0.107473	0.434026	0.052205	0.0151076	0.123235	0.00976478	0.00067718	0.0384599	0.0407679	0.00556471	0.136053	0.0732101	0.0137383	0.212712	0.0335449	0.00533102	0.105115	0.0325915	0.0122365	0.064227	0.00622867	0.000230242	0.0261019	0	0	0	0.143705	0.0618143	0.251256	0.0285295	0.00822002	0.067414	0.0065553	0.000458373	0.0260559	0.0213969	0.00274684	0.072943	0.0425294	0.00797411	0.123676	0.0194429	0.00306245	0.061077	0.0189115	0.00706751
Australasia	2015	blind	0.235001	0.0962289	0.417654	0.0457412	0.0118853	0.113703	0.011008	0.000636718	0.0455379	0.0382581	0.00447477	0.134094	0.0719873	0.0128309	0.21255	0.031453	0.00434784	0.102979	0.0308446	0.0109688	0.0618898	0.00560424	0.000173806	0.0243378	0	0	0	0.126061	0.0513763	0.224486	0.0228801	0.00592084	0.0570032	0.00692639	0.000406671	0.0289344	0.0186473	0.00205388	0.0666675	0.0384085	0.00682354	0.113759	0.0170656	0.00234735	0.0560028	0.0166159	0.0058806
Australasia	2020	blind	0.233979	0.0905461	0.425328	0.0435559	0.0101253	0.114345	0.0120632	0.000574624	0.0523309	0.0361007	0.00350708	0.134356	0.0744986	0.0125353	0.225126	0.0316472	0.00376667	0.109227	0.0307443	0.0103297	0.0630815	0.00531042	0.000135207	0.023599	0	0	0	0.116209	0.0447124	0.211589	0.019902	0.00459132	0.0523742	0.00699004	0.000334891	0.0306695	0.0162505	0.00148467	0.0615236	0.0367805	0.00616931	0.111384	0.015758	0.00185752	0.0546195	0.015333	0.00512128
Europe, Central	1990	blind	0.509523	0.122514	1.03584	0.140115	0.025165	0.364441	0.0128415	0.000333232	0.0599241	0.0933365	0.00603444	0.375657	0.0994058	0.00560377	0.402989	0.0693353	0.00500428	0.277995	0.0656595	0.0135214	0.151796	0.0257331	0.000542593	0.123073	0	0	0	0.418431	0.100908	0.849863	0.115522	0.0208539	0.299663	0.0110907	0.000284449	0.0520129	0.0758289	0.00484439	0.306562	0.0832585	0.00474988	0.335554	0.056019	0.00399114	0.225465	0.0538444	0.0110963
Europe, Central	1995	blind	0.474846	0.1205	0.946929	0.129615	0.0242882	0.332965	0.0138565	0.000397953	0.0632543	0.0842485	0.00552586	0.339436	0.0969394	0.00570462	0.386662	0.0639493	0.00476676	0.254202	0.0613749	0.0133772	0.13903	0.0222752	0.000499526	0.102527	0	0	0	0.364281	0.0925334	0.72608	0.0987664	0.0185239	0.253553	0.0104173	0.000284405	0.0479067	0.064735	0.00422784	0.260951	0.0765586	0.00460018	0.302841	0.0492686	0.00366553	0.195786	0.047062	0.0102565
Europe, Central	2000	blind	0.452794	0.119539	0.89734	0.118828	0.0227445	0.306157	0.0135612	0.000388613	0.0617613	0.0779425	0.00503353	0.318486	0.100254	0.006267	0.39415	0.0619715	0.00474881	0.246058	0.0587047	0.0133363	0.131993	0.0194728	0.000448531	0.0879028	0	0	0	0.31912	0.0842493	0.632293	0.0837658	0.0160304	0.215687	0.00976232	0.000268383	0.0447658	0.0547184	0.00351432	0.223699	0.0700953	0.00437488	0.275691	0.0432092	0.00326846	0.172186	0.041372	0.00939322
Europe, Central	2005	blind	0.445971	0.121274	0.874209	0.116282	0.0225066	0.29919	0.0136822	0.000372903	0.0618601	0.0755464	0.0047474	0.309856	0.100489	0.00637616	0.393342	0.0626451	0.00477514	0.248969	0.0579336	0.0135764	0.128766	0.0179993	0.000405949	0.0797383	0	0	0	0.282778	0.0767853	0.55427	0.0721087	0.0138541	0.186185	0.00932787	0.000248216	0.0425546	0.0466549	0.00286555	0.192855	0.0652793	0.0041916	0.253981	0.0385442	0.00287328	0.154132	0.0367663	0.00860135
Europe, Central	2010	blind	0.451139	0.122774	0.894357	0.114695	0.0215358	0.30405	0.0141767	0.000356627	0.0657014	0.0741092	0.00435634	0.313606	0.107752	0.00686254	0.426168	0.0637252	0.00461881	0.261201	0.0586615	0.0137678	0.131818	0.0169782	0.00034956	0.0751589	0	0	0	0.256484	0.0695475	0.508331	0.0641868	0.0119953	0.17022	0.00889347	0.000218162	0.0416226	0.040067	0.00224611	0.171796	0.0625885	0.00401345	0.246194	0.035355	0.00250432	0.145593	0.0334201	0.00781558
Europe, Central	2015	blind	0.46105	0.121692	0.941246	0.115645	0.0203306	0.321421	0.0148277	0.000320276	0.0722169	0.0725121	0.00372682	0.32482	0.115606	0.00714532	0.470202	0.0644056	0.00421217	0.276836	0.0599408	0.0136418	0.138731	0.0169638	0.000302463	0.0783223	0	0	0	0.234121	0.0613197	0.477729	0.056634	0.00985751	0.157526	0.00856535	0.000182572	0.0421939	0.0343143	0.00165923	0.155945	0.0597082	0.00369876	0.241774	0.0323581	0.00207567	0.139449	0.0305672	0.00691048
Europe, Central	2020	blind	0.457335	0.116397	0.931291	0.110446	0.0178972	0.313764	0.0166973	0.000310603	0.0831828	0.0697317	0.00305601	0.320475	0.119823	0.00713955	0.485699	0.0636094	0.00367685	0.278316	0.0595331	0.0130699	0.137433	0.0163875	0.000247572	0.0770282	0	0	0	0.210623	0.0530714	0.428539	0.0484084	0.00773828	0.137609	0.0086653	0.000158311	0.0437514	0.0298179	0.00122756	0.13888	0.0558894	0.00333126	0.225661	0.0293271	0.00166764	0.128467	0.0275555	0.00599775
Europe, Eastern	1990	blind	0.580163	0.160358	1.15843	0.141067	0.0283312	0.366972	0.0219844	0.000703312	0.102514	0.124281	0.0101926	0.46514	0.108385	0.00706657	0.430589	0.0793329	0.00645284	0.311674	0.0743961	0.0176333	0.168966	0.0284204	0.000631463	0.135517	0	0	0	0.448578	0.124089	0.894876	0.109505	0.0220335	0.284076	0.0177263	0.000553122	0.0833665	0.094691	0.00760888	0.357286	0.0847776	0.00554662	0.335669	0.0599375	0.00479476	0.236755	0.0575104	0.0136247
Europe, Eastern	1995	blind	0.523219	0.154899	1.03426	0.125724	0.0266335	0.325924	0.0220036	0.000758038	0.102092	0.110965	0.00930353	0.41914	0.100906	0.00692349	0.399206	0.0700821	0.00593599	0.275599	0.0673896	0.0171669	0.151244	0.0239229	0.000572445	0.11168	0	0	0	0.383639	0.113508	0.758051	0.0910261	0.0192608	0.235967	0.0166347	0.000562619	0.0775839	0.0805643	0.0066494	0.30606	0.076472	0.0053507	0.299905	0.0518462	0.00438017	0.20367	0.0494429	0.0125823
Europe, Eastern	2000	blind	0.469316	0.145909	0.905789	0.106	0.0230815	0.272189	0.0231253	0.000856501	0.104938	0.096431	0.00791245	0.364796	0.0977433	0.00717917	0.374353	0.063775	0.0055559	0.247533	0.0607309	0.0162906	0.132839	0.0195861	0.000479552	0.087863	0	0	0	0.329468	0.102406	0.635775	0.0744592	0.0161966	0.191042	0.0157169	0.000543732	0.0721534	0.0677834	0.00554316	0.256267	0.0682024	0.005013	0.261249	0.0444424	0.00383082	0.172954	0.0426474	0.0114341
Europe, Eastern	2005	blind	0.438292	0.138818	0.833339	0.097342	0.0211507	0.248258	0.0204843	0.000682383	0.0926598	0.0894906	0.00697495	0.34096	0.0946643	0.00704695	0.358486	0.0611506	0.00521896	0.236072	0.056913	0.0155729	0.122531	0.0172159	0.000407321	0.0749564	0	0	0	0.291189	0.0922477	0.553477	0.0640845	0.0138536	0.163783	0.0149106	0.000499263	0.0676945	0.0582623	0.00447577	0.223134	0.0636724	0.00477292	0.24021	0.0397455	0.00333562	0.154191	0.0378144	0.0103453
Europe, Eastern	2010	blind	0.433991	0.138458	0.818528	0.0965354	0.0206021	0.247559	0.0216066	0.000692403	0.0977923	0.0844426	0.00608042	0.328634	0.0970327	0.0071702	0.366641	0.0615972	0.00506016	0.239841	0.0564238	0.015563	0.120463	0.0159534	0.000345831	0.0678409	0	0	0	0.267127	0.0851557	0.503665	0.0582769	0.0123736	0.149816	0.0138738	0.000429551	0.0633974	0.0504205	0.00352433	0.198633	0.0620875	0.00468176	0.232347	0.0368942	0.00296941	0.144444	0.0347604	0.00957677
Europe, Eastern	2015	blind	0.412243	0.128906	0.783168	0.0854104	0.0170541	0.226182	0.0209813	0.000583393	0.0982158	0.0795504	0.00513488	0.319227	0.0993878	0.00736596	0.374847	0.0585588	0.00439982	0.234258	0.0536621	0.0145136	0.115381	0.0143713	0.000272946	0.0615247	0	0	0	0.23702	0.07386	0.450482	0.0488998	0.00974244	0.129346	0.0135722	0.000375824	0.064117	0.0433162	0.00264778	0.176777	0.0572145	0.00421792	0.215823	0.0328628	0.00241742	0.132144	0.0309285	0.00833765
Europe, Eastern	2020	blind	0.390448	0.118379	0.747735	0.079569	0.0147944	0.217527	0.0227546	0.000554166	0.109009	0.0730286	0.00401011	0.306336	0.0952043	0.00669541	0.364652	0.0549086	0.00365425	0.226967	0.0508954	0.0133442	0.110324	0.0135384	0.000216981	0.0590968	0	0	0	0.213282	0.0643325	0.408457	0.0419368	0.0077278	0.114818	0.0135202	0.000326644	0.0655676	0.0378894	0.00197148	0.161442	0.0538868	0.00384531	0.204799	0.0299635	0.00197219	0.123901	0.0278921	0.00727955
Europe, Western	1990	blind	0.299472	0.169695	0.454288	0.0733114	0.0309597	0.140514	0.00765078	0.000893964	0.024334	0.0565592	0.0124986	0.150785	0.0708775	0.0173961	0.17947	0.0407788	0.009563	0.106004	0.0391597	0.0192568	0.0670988	0.0101996	0.000561598	0.0376346	0	0	0	0.175942	0.0994736	0.267216	0.0417052	0.0175152	0.0801678	0.00532905	0.00062148	0.0170484	0.0307702	0.00644261	0.0838908	0.0425601	0.0104856	0.107521	0.0234786	0.00541054	0.0613961	0.0230709	0.0113187
Europe, Western	1995	blind	0.284392	0.165108	0.4258	0.0680501	0.0291074	0.129667	0.00832056	0.001008	0.0262587	0.0522043	0.0116547	0.138654	0.0708038	0.0177596	0.177325	0.0380613	0.00909459	0.0979397	0.0372229	0.0187593	0.0629381	0.00892247	0.000506695	0.0321629	0	0	0	0.156596	0.0906429	0.234892	0.0357323	0.0152047	0.068272	0.00525455	0.000625667	0.0167526	0.0265141	0.00560411	0.0721248	0.0398952	0.0100593	0.0995721	0.0209316	0.0049495	0.0540324	0.0205704	0.0103353
Europe, Western	2000	blind	0.272775	0.158872	0.407117	0.0620519	0.026048	0.119636	0.00837933	0.000961161	0.0269358	0.0480184	0.010375	0.129607	0.0734136	0.018708	0.181761	0.0364604	0.00861825	0.0938981	0.0357432	0.0180677	0.0602426	0.00787226	0.000439387	0.0281274	0	0	0	0.140545	0.0815883	0.210189	0.0304769	0.0127484	0.0588503	0.0051207	0.00058423	0.0165919	0.022651	0.00463926	0.0625936	0.037411	0.00946679	0.0930613	0.0186714	0.00436049	0.0483336	0.0184895	0.00931499
Europe, Western	2005	blind	0.265279	0.152015	0.398713	0.0596514	0.0239738	0.117709	0.00859715	0.000884202	0.0285658	0.044981	0.0089935	0.125403	0.0732595	0.0181282	0.183767	0.0361207	0.00814127	0.0948966	0.034802	0.0173093	0.059059	0.00716163	0.000382053	0.0257832	0	0	0	0.127922	0.0730542	0.192636	0.0267894	0.0106878	0.053073	0.0050512	0.00052101	0.0169244	0.0196011	0.0036796	0.0559437	0.0358771	0.00892312	0.0898973	0.0171093	0.00378686	0.0452785	0.0168487	0.00835057
Europe, Western	2010	blind	0.267194	0.147238	0.409856	0.057909	0.0214525	0.119932	0.00897813	0.000791991	0.0309072	0.0430761	0.0075054	0.126345	0.0786985	0.0188243	0.201189	0.0363187	0.00742272	0.099899	0.0350805	0.0167749	0.0607478	0.00662768	0.00031422	0.0243356	0	0	0	0.118978	0.0653243	0.182846	0.0243021	0.00895627	0.0503975	0.00493656	0.00043723	0.01721	0.0170034	0.00276062	0.0511409	0.0353966	0.00846885	0.0904983	0.0160596	0.00323393	0.0443788	0.0156842	0.00747192
Europe, Western	2015	blind	0.273371	0.1428	0.431469	0.0579949	0.0193723	0.127465	0.00942297	0.000666919	0.0346459	0.0415645	0.00612993	0.130018	0.0847216	0.0192148	0.22232	0.0366926	0.00653547	0.106583	0.0358864	0.0162657	0.063943	0.00667731	0.000266704	0.0256175	0	0	0	0.110114	0.0572341	0.174208	0.0214124	0.00711415	0.0471785	0.00486802	0.00035383	0.0181302	0.0146108	0.002001	0.0467636	0.0340645	0.00771142	0.0896639	0.0147942	0.00260317	0.0431717	0.0145272	0.00655132
Europe, Western	2020	blind	0.269349	0.13172	0.439757	0.0542435	0.0160523	0.127399	0.010704	0.000612317	0.0414862	0.0397568	0.00488253	0.133132	0.086511	0.018358	0.234844	0.0361257	0.00544339	0.11195	0.0353926	0.0150168	0.0652352	0.00635815	0.000205391	0.0254916	0	0	0	0.0995854	0.0484387	0.162951	0.0180478	0.00529954	0.0425025	0.00503846	0.000297042	0.0198436	0.0127433	0.00144816	0.0435935	0.031876	0.00675682	0.0867634	0.0134049	0.00199888	0.0417711	0.0131522	0.00554985
North America, High Income	1990	blind	0.321111	0.148401	0.555799	0.0737155	0.0252387	0.161921	0.010643	0.0010226	0.0388645	0.0649488	0.0121095	0.194052	0.0748169	0.0150297	0.215685	0.0430037	0.00818514	0.127558	0.0417906	0.0167307	0.0817075	0.011009	0.000483283	0.0465209	0	0	0	0.221499	0.101979	0.38425	0.0486788	0.0165628	0.107406	0.00836873	0.000802829	0.0306869	0.0419669	0.00746406	0.128083	0.0519832	0.0104306	0.150022	0.0293418	0.00551098	0.0875566	0.0289457	0.0115498
North America, High Income	1995	blind	0.307256	0.143402	0.523426	0.0691303	0.0236599	0.15053	0.0102634	0.000974565	0.0372694	0.0597078	0.0110189	0.178039	0.0762037	0.0154903	0.215939	0.0409441	0.00784129	0.119833	0.0400214	0.0161816	0.0770115	0.00966004	0.000431577	0.0398333	0	0	0	0.203525	0.0945169	0.347623	0.0436544	0.0148523	0.0953439	0.00795924	0.000764651	0.0289931	0.0364327	0.00636268	0.111299	0.0505831	0.0102391	0.143706	0.0269585	0.00510156	0.0792455	0.0266409	0.0107241
North America, High Income	2000	blind	0.289486	0.136297	0.490767	0.0632025	0.0213846	0.138802	0.0102496	0.000924295	0.0377489	0.0541151	0.00961526	0.164384	0.0757805	0.0155335	0.213565	0.0387648	0.00735978	0.113572	0.0377594	0.015403	0.0722808	0.00841538	0.000374611	0.0342085	0	0	0	0.18537	0.0868232	0.315019	0.0383251	0.0128871	0.0843902	0.00779645	0.000720517	0.0287881	0.0316067	0.00530214	0.0984754	0.0485663	0.00991672	0.137267	0.0245917	0.00460648	0.0724584	0.0243037	0.00986791
North America, High Income	2005	blind	0.274916	0.127232	0.463432	0.0580913	0.0187124	0.129275	0.010583	0.000861938	0.0395691	0.0490671	0.00798513	0.152522	0.0761762	0.0153384	0.213452	0.0368646	0.00661566	0.109087	0.0359195	0.0144043	0.068396	0.00740347	0.000312641	0.0298659	0	0	0	0.169822	0.0782227	0.286925	0.0339533	0.0108799	0.0757094	0.0077323	0.00064793	0.0290288	0.02758	0.00422351	0.0877546	0.0471205	0.00946211	0.132398	0.0227185	0.00403561	0.0674861	0.0222984	0.00890551
North America, High Income	2010	blind	0.274788	0.123302	0.466718	0.0570689	0.0171052	0.131301	0.0112709	0.000809265	0.0432908	0.0455031	0.00645042	0.147761	0.080792	0.0157638	0.228063	0.0367346	0.00604111	0.112104	0.0359337	0.0139673	0.0689299	0.00700932	0.000266926	0.0287788	0	0	0	0.159031	0.0710221	0.270705	0.0309657	0.00924233	0.0713769	0.00755062	0.000550105	0.0292612	0.023989	0.00319384	0.0796071	0.0466792	0.00908855	0.132148	0.0214124	0.00349576	0.0655013	0.0209029	0.00809136
North America, High Income	2015	blind	0.274392	0.116806	0.476034	0.0547509	0.0148082	0.132556	0.0124239	0.000749086	0.0504315	0.0428831	0.00513933	0.147518	0.0849888	0.0157489	0.244834	0.0366476	0.00526432	0.117226	0.0359304	0.0132484	0.070403	0.00663907	0.00021527	0.0280153	0	0	0	0.146485	0.0620568	0.254719	0.0271749	0.00731658	0.0659974	0.00762728	0.000461365	0.0312867	0.0209614	0.00236834	0.0734897	0.045036	0.00831954	0.130226	0.0198415	0.002839	0.0636267	0.019277	0.00707881
North America, High Income	2020	blind	0.277836	0.11141	0.49614	0.0531498	0.0128693	0.136648	0.013683	0.000673961	0.0582213	0.0407583	0.00405671	0.149658	0.0898528	0.0156774	0.266555	0.0375862	0.00462783	0.127501	0.0364273	0.0126563	0.0734645	0.00636154	0.000169842	0.0276362	0	0	0	0.136413	0.0543966	0.244062	0.0240663	0.00577476	0.0620685	0.00768897	0.000374985	0.0331915	0.0183473	0.00172261	0.0684911	0.043737	0.00760501	0.13013	0.0185531	0.0022639	0.0632236	0.017968	0.00621083
Asia Pacific, High Income	1990	sm	1.7943	0.920167	2.84783	0.306911	0.116323	0.623299	0.0565175	0.00631671	0.190742	0.223259	0.040076	0.657639	0.231489	0.0419873	0.65201	0.0635545	0.0114513	0.190443	0.893122	0.440246	1.46278	0.0213143	0.00109592	0.0775443	0	0	0	1.50867	0.772356	2.39633	0.258819	0.0976917	0.52652	0.0480558	0.00525535	0.163173	0.186835	0.0331126	0.553089	0.196639	0.0356417	0.553952	0.052806	0.0094261	0.158704	0.751383	0.3697
Asia Pacific, High Income	1995	sm	1.93071	1.03882	3.01447	0.32215	0.126818	0.647253	0.0664042	0.00784039	0.220411	0.23731	0.0453491	0.686959	0.260204	0.0494012	0.721706	0.0677401	0.0128924	0.198247	0.960726	0.497657	1.54635	0.0203599	0.0011476	0.0724885	0	0	0	1.41525	0.756627	2.21675	0.232423	0.0906081	0.469337	0.049936	0.00569283	0.167623	0.169954	0.0314587	0.498645	0.194499	0.0368217	0.540366	0.0492891	0.00924654	0.145129	0.706674	0.364262
Asia Pacific, High Income	2000	sm	2.07779	1.14483	3.20916	0.32897	0.130427	0.662587	0.0785651	0.00903923	0.260489	0.254584	0.049438	0.731904	0.293851	0.0572693	0.805363	0.072742	0.0139409	0.210951	1.03375	0.548774	1.64512	0.0197893	0.00115945	0.0704421	0	0	0	1.31966	0.718817	2.05095	0.203367	0.0793537	0.412992	0.0531446	0.00587565	0.178913	0.154149	0.0284294	0.453198	0.189212	0.036505	0.521621	0.0456608	0.00855661	0.133742	0.660868	0.347866
Asia Pacific, High Income	2005	sm	2.26889	1.24633	3.50254	0.34447	0.132989	0.704784	0.0918004	0.00956048	0.313185	0.276199	0.0517607	0.798441	0.33252	0.064541	0.911524	0.0799649	0.0147083	0.234365	1.12767	0.596583	1.7941	0.0199414	0.0011127	0.0719471	0	0	0	1.24579	0.672683	1.94204	0.180096	0.0678614	0.373034	0.0563155	0.00563651	0.195513	0.139608	0.0242641	0.417215	0.185875	0.0355561	0.514053	0.0428813	0.00763356	0.127533	0.625328	0.326733
Asia Pacific, High Income	2010	sm	2.52724	1.3548	3.93262	0.37917	0.138395	0.797859	0.101886	0.0090809	0.359912	0.294616	0.0503033	0.876142	0.390333	0.0737264	1.0795	0.0898314	0.0151965	0.270574	1.25338	0.646184	2.01233	0.0211108	0.00107701	0.077651	0	0	0	1.21301	0.635773	1.91212	0.170991	0.0605369	0.365115	0.0569207	0.00485465	0.205278	0.125371	0.0194246	0.388485	0.191971	0.0356394	0.536793	0.0419837	0.00683195	0.128893	0.609525	0.30923
Asia Pacific, High Income	2015	sm	2.73874	1.41599	4.31237	0.395956	0.133278	0.865196	0.116354	0.0084228	0.429535	0.312346	0.0463582	0.9651	0.441919	0.080408	1.23715	0.0975816	0.0145109	0.305667	1.35637	0.673129	2.20686	0.0222301	0.000977885	0.0827681	0	0	0	1.16726	0.586571	1.86678	0.156011	0.0506041	0.3466	0.0608526	0.00427424	0.23006	0.114582	0.0151286	0.370923	0.193111	0.0343836	0.547831	0.0408002	0.0058172	0.130507	0.587408	0.285726
Asia Pacific, High Income	2020	sm	2.87614	1.40384	4.65473	0.382671	0.115045	0.887225	0.142759	0.00815057	0.558748	0.330354	0.0409161	1.0852	0.475357	0.0817039	1.36716	0.102871	0.0127954	0.345486	1.42435	0.665784	2.38489	0.0226951	0.000795091	0.0885389	0	0	0	1.10159	0.519317	1.81327	0.132636	0.0381141	0.313127	0.0685508	0.00385467	0.275151	0.106654	0.011585	0.368275	0.185317	0.0309553	0.540872	0.0386235	0.0045808	0.132604	0.555536	0.253447
Australasia	1990	sm	2.14216	0.956732	3.64844	0.369224	0.122056	0.803926	0.0675511	0.00648059	0.245775	0.279067	0.0444632	0.875102	0.27502	0.0434717	0.830915	0.0763376	0.0120059	0.245334	1.05471	0.445318	1.86884	0.0255981	0.00113541	0.0999906	0	0	0	1.75971	0.778823	3.01027	0.296352	0.0968476	0.649266	0.0590707	0.0055191	0.216752	0.220034	0.0337454	0.701395	0.229248	0.0359601	0.695103	0.0616099	0.00949294	0.199561	0.8711	0.365807
Australasia	1995	sm	2.17313	1.00605	3.68714	0.369008	0.125276	0.804613	0.0705589	0.0069206	0.256776	0.273659	0.0453667	0.857938	0.295228	0.0482786	0.889354	0.076887	0.0126025	0.244054	1.0698	0.468899	1.88763	0.0234966	0.00112586	0.0908861	0	0	0	1.67509	0.765815	2.8601	0.275943	0.0922215	0.606698	0.05912	0.00567444	0.216933	0.198555	0.0311887	0.636953	0.232282	0.0376541	0.70291	0.0583764	0.00935329	0.187233	0.831132	0.361738
Australasia	2000	sm	2.19998	1.02532	3.66075	0.357838	0.120364	0.775339	0.0761137	0.00705644	0.275673	0.267865	0.0439457	0.83056	0.319231	0.0527086	0.941887	0.0780504	0.0126762	0.243627	1.08395	0.479425	1.87434	0.0217992	0.00107184	0.0835987	0	0	0	1.5845	0.72753	2.65683	0.250783	0.0828025	0.548377	0.060902	0.00557295	0.222381	0.179096	0.0275355	0.570926	0.231736	0.0377378	0.688729	0.0550432	0.00871239	0.173806	0.788226	0.345776
Australasia	2005	sm	2.22822	1.04369	3.70073	0.352319	0.116284	0.773863	0.0829839	0.00696133	0.30638	0.262169	0.0413628	0.82249	0.337551	0.0558045	0.995404	0.0793011	0.0124382	0.250128	1.09903	0.48882	1.89541	0.0205914	0.000985273	0.0795141	0	0	0	1.50388	0.692381	2.5192	0.228389	0.0736424	0.506894	0.0634557	0.00528977	0.236302	0.161828	0.0236261	0.524006	0.232157	0.0379163	0.689109	0.0524223	0.0079923	0.167362	0.749982	0.330475
Australasia	2010	sm	2.2362	1.02862	3.75192	0.340701	0.106602	0.773001	0.0930802	0.00688583	0.357647	0.250853	0.0361199	0.81174	0.356984	0.0579142	1.06353	0.0792991	0.0114271	0.25735	1.1044	0.482617	1.92328	0.0194427	0.000848187	0.076625	0	0	0	1.43402	0.647263	2.4294	0.208467	0.0636705	0.47793	0.0664414	0.0048116	0.258488	0.146358	0.0193646	0.489518	0.233154	0.0373448	0.699936	0.0503815	0.00706437	0.165722	0.716737	0.310037
Australasia	2015	sm	2.22212	0.980016	3.80135	0.310256	0.0887521	0.738042	0.110037	0.00673828	0.444042	0.247643	0.030671	0.838631	0.366948	0.057236	1.11311	0.078685	0.00986256	0.268576	1.10053	0.461349	1.95272	0.0183027	0.000684261	0.0740997	0	0	0	1.3349	0.576172	2.30632	0.176581	0.0490633	0.424694	0.0745772	0.00447425	0.305332	0.135328	0.0153345	0.473811	0.222974	0.0341462	0.68255	0.0471985	0.00575012	0.163222	0.669296	0.277173
Australasia	2020	sm	2.28834	0.966881	3.96754	0.305013	0.0796336	0.755516	0.124605	0.00624704	0.523919	0.242249	0.0251635	0.862503	0.391707	0.0585186	1.20499	0.0826317	0.00891798	0.297609	1.1344	0.455171	2.04086	0.018028	0.000557769	0.0746984	0	0	0	1.28543	0.530133	2.25323	0.160439	0.0404413	0.402716	0.0787019	0.00381129	0.337053	0.123089	0.0116604	0.453387	0.223179	0.0326516	0.693164	0.0458509	0.00477631	0.167529	0.645544	0.255382
Europe, Central	1990	sm	2.46023	0.739332	4.80086	0.482402	0.107324	1.21923	0.0605213	0.0022323	0.282358	0.305759	0.0221267	1.22035	0.256884	0.0127672	1.11797	0.0929206	0.00618803	0.389325	1.20766	0.334795	2.47655	0.0522222	0.00107114	0.225192	0	0	0	2.04291	0.610827	3.98649	0.399086	0.088541	1.00727	0.0526063	0.00189637	0.246401	0.250167	0.0176884	1.00659	0.217181	0.0108432	0.943114	0.0759661	0.00496154	0.319032	1.00447	0.277076
Europe, Central	1995	sm	2.36496	0.744633	4.56573	0.458938	0.105515	1.15932	0.0662814	0.00270145	0.306119	0.283235	0.0208374	1.13837	0.256215	0.0132639	1.10723	0.0875763	0.00599365	0.367092	1.16578	0.341391	2.35617	0.0455071	0.00102022	0.189891	0	0	0	1.84281	0.576331	3.5603	0.351896	0.0803709	0.889804	0.0510645	0.00196386	0.237471	0.220296	0.0159305	0.889265	0.206201	0.0107816	0.886975	0.0684681	0.00463831	0.287467	0.910631	0.265179
Europe, Central	2000	sm	2.32148	0.756622	4.44036	0.433539	0.100803	1.10035	0.0676306	0.00279577	0.310431	0.272005	0.0198276	1.10292	0.272106	0.0147876	1.16113	0.0875864	0.00612277	0.365212	1.14864	0.35065	2.2925	0.0405708	0.000951297	0.164544	0	0	0	1.67336	0.540704	3.20453	0.309569	0.0713852	0.78663	0.0498939	0.00195944	0.230362	0.193784	0.0138397	0.790455	0.196468	0.0106188	0.837908	0.0621707	0.00424995	0.260435	0.830685	0.251888
Europe, Central	2005	sm	2.32804	0.75567	4.37228	0.43029	0.0977337	1.08605	0.0700837	0.0026554	0.316462	0.269194	0.018646	1.09258	0.279906	0.0149744	1.17537	0.0898231	0.00603903	0.373324	1.15422	0.352549	2.25833	0.0374663	0.000847572	0.148808	0	0	0	1.5363	0.492489	2.89207	0.275696	0.0614844	0.699713	0.0495968	0.00181506	0.22589	0.171526	0.011367	0.705294	0.189846	0.0101868	0.795909	0.0574106	0.0037401	0.239803	0.765539	0.23176
Europe, Central	2010	sm	2.38088	0.762038	4.47541	0.43042	0.0932563	1.10936	0.0745437	0.00253622	0.337082	0.265465	0.0170685	1.10152	0.303776	0.0160617	1.2766	0.0928496	0.00586469	0.392351	1.18153	0.3566	2.31279	0.0354853	0.000762218	0.14076	0	0	0	1.43845	0.452387	2.71297	0.253096	0.0537821	0.654716	0.0489201	0.0015866	0.223506	0.151954	0.00909223	0.643007	0.188175	0.00990742	0.790286	0.0543421	0.00331394	0.230827	0.718836	0.214358
Europe, Central	2015	sm	2.45803	0.750477	4.61602	0.437548	0.0870177	1.1503	0.0798589	0.00225204	0.363392	0.262417	0.0146768	1.11737	0.329354	0.0165914	1.38346	0.0956829	0.00535783	0.41306	1.22006	0.351091	2.38749	0.0351362	0.000667378	0.141316	0	0	0	1.36005	0.404984	2.56231	0.232596	0.0449875	0.613528	0.0489864	0.00131698	0.225459	0.135095	0.0069062	0.587171	0.18728	0.00933665	0.78524	0.0518831	0.00280026	0.224788	0.681395	0.192831
Europe, Central	2020	sm	2.50241	0.703672	4.7491	0.424912	0.0741285	1.15981	0.0931056	0.00211962	0.435134	0.260532	0.0119457	1.15277	0.348967	0.0161811	1.48181	0.0978402	0.00458471	0.43618	1.24411	0.329978	2.45977	0.0343903	0.000528092	0.141117	0	0	0	1.27674	0.347771	2.42648	0.206894	0.0347859	0.565695	0.0523154	0.00112014	0.247841	0.123081	0.0051244	0.55445	0.183171	0.00834679	0.774217	0.0494445	0.00222311	0.220855	0.641469	0.166412
Europe, Eastern	1990	sm	3.63095	1.31429	6.45434	0.630678	0.16453	1.47115	0.144072	0.00678827	0.621441	0.542339	0.0518092	1.8896	0.372096	0.0223676	1.47442	0.143835	0.0112472	0.553552	1.73347	0.56756	3.28454	0.0759386	0.00174668	0.302715	0	0	0	2.87426	1.03005	5.12165	0.499064	0.128991	1.16595	0.117477	0.00532338	0.51103	0.422723	0.0389072	1.49262	0.296495	0.0177139	1.17664	0.110931	0.00843578	0.429973	1.37873	0.448162
Europe, Eastern	1995	sm	3.43434	1.31042	6.03649	0.590152	0.16018	1.37906	0.145684	0.00730142	0.620989	0.502641	0.048978	1.77086	0.3576	0.0223857	1.40757	0.130887	0.0104234	0.504144	1.65029	0.576459	3.07334	0.0649399	0.00161742	0.249849	0	0	0	2.58503	0.975823	4.55809	0.434497	0.116583	1.01815	0.113594	0.00552286	0.488707	0.374086	0.0352756	1.33292	0.279603	0.017626	1.09863	0.0995528	0.00782138	0.384947	1.24888	0.433034
Europe, Eastern	2000	sm	3.23794	1.27524	5.70051	0.518643	0.141419	1.23058	0.159801	0.00866124	0.682679	0.457892	0.0426186	1.65658	0.361119	0.0237225	1.42032	0.125313	0.0100724	0.484427	1.56716	0.570384	2.90786	0.0552079	0.00141802	0.208186	0	0	0	2.3291	0.908389	4.11439	0.37073	0.100038	0.882278	0.111579	0.00556058	0.483709	0.328277	0.0300675	1.19506	0.260488	0.0169891	1.02568	0.0888219	0.00699627	0.345542	1.13296	0.409507
Europe, Eastern	2005	sm	3.12523	1.24878	5.53191	0.492462	0.13342	1.19326	0.146632	0.00700895	0.641248	0.442628	0.0395878	1.64216	0.363201	0.0239927	1.43646	0.123132	0.00971963	0.486093	1.52012	0.563803	2.82716	0.0497186	0.00124748	0.187901	0	0	0	2.13769	0.844873	3.79914	0.331677	0.0884092	0.808214	0.109914	0.00524154	0.483821	0.29343	0.0253182	1.1033	0.253133	0.0167396	1.00268	0.0824721	0.00632148	0.327424	1.04563	0.384878
Europe, Eastern	2010	sm	3.11679	1.2404	5.5491	0.492661	0.12882	1.22073	0.156905	0.00705433	0.691732	0.416439	0.0341154	1.60449	0.376598	0.0246037	1.50296	0.124827	0.0093856	0.501515	1.51865	0.561839	2.83891	0.0458506	0.00110691	0.175067	0	0	0	2.01234	0.789248	3.60351	0.307898	0.0789497	0.768753	0.105135	0.00451778	0.469639	0.25958	0.0200871	1.02128	0.252478	0.01658	1.00774	0.0781608	0.00569818	0.317392	0.988134	0.36231
Europe, Eastern	2015	sm	3.03576	1.15842	5.43838	0.445497	0.106504	1.14117	0.159266	0.00599568	0.715943	0.400862	0.0290313	1.59653	0.39436	0.0250847	1.57641	0.123232	0.00824246	0.511395	1.48355	0.527111	2.78771	0.0420576	0.000889587	0.1628	0	0	0	1.86613	0.698871	3.36453	0.270322	0.0633595	0.695655	0.107122	0.00390809	0.488581	0.233349	0.0155755	0.953712	0.243699	0.0152868	0.978912	0.0731582	0.00472153	0.305589	0.920559	0.323488
Europe, Eastern	2020	sm	2.97912	1.05631	5.42549	0.423124	0.0898998	1.12892	0.17662	0.00547328	0.82066	0.379061	0.0225083	1.58705	0.389584	0.0226874	1.58862	0.119417	0.00668951	0.516587	1.46072	0.482989	2.78836	0.0398563	0.000685056	0.156831	0	0	0	1.75214	0.608089	3.20954	0.241434	0.0498554	0.647325	0.110923	0.00330356	0.524713	0.212186	0.011638	0.909075	0.239184	0.0138954	0.975706	0.0698736	0.00381035	0.303804	0.867537	0.283165
Europe, Western	1990	sm	2.10764	1.14428	3.23365	0.374318	0.150129	0.734059	0.054443	0.00633312	0.177687	0.273768	0.0536572	0.767666	0.262233	0.050203	0.715027	0.0743329	0.0143279	0.215105	1.04551	0.547133	1.65368	0.0245764	0.00131942	0.0866263	0	0	0	1.33656	0.717632	2.06312	0.227997	0.0901601	0.450748	0.0398185	0.00452894	0.131297	0.159499	0.0290397	0.461863	0.171273	0.0326293	0.468612	0.0458051	0.00858551	0.134005	0.668865	0.347546
Europe, Western	1995	sm	2.08309	1.14807	3.18271	0.360671	0.14523	0.709364	0.0609586	0.00731256	0.197762	0.261837	0.0521993	0.734198	0.273137	0.0530304	0.741921	0.0718993	0.0140672	0.205074	1.03447	0.550211	1.62803	0.0220445	0.00125203	0.0772579	0	0	0	1.25538	0.683273	1.93157	0.206282	0.081748	0.409335	0.0410602	0.00472464	0.135167	0.144864	0.0268033	0.419541	0.170421	0.0329375	0.464676	0.042898	0.00818829	0.123897	0.629716	0.332286
Europe, Western	2000	sm	2.08259	1.14375	3.18663	0.342802	0.135309	0.683908	0.0648917	0.00729483	0.213753	0.251854	0.0489829	0.714855	0.296001	0.0576732	0.802625	0.0722123	0.0138742	0.207148	1.0357	0.549313	1.63162	0.0201908	0.00117096	0.0715901	0	0	0	1.1863	0.642803	1.82905	0.186577	0.072423	0.375441	0.0424799	0.00461666	0.141958	0.130523	0.0235352	0.382756	0.169214	0.0325174	0.462551	0.0403009	0.00753163	0.116966	0.596317	0.313602
Europe, Western	2005	sm	2.10237	1.13231	3.25214	0.340205	0.128961	0.696078	0.0696665	0.00689857	0.237131	0.24514	0.0445976	0.715135	0.308955	0.05862	0.849843	0.0739867	0.0134479	0.216811	1.0468	0.544332	1.66699	0.0190588	0.00104981	0.0687948	0	0	0	1.13179	0.600677	1.76508	0.171847	0.063691	0.35539	0.0442798	0.00427456	0.152612	0.118107	0.0197548	0.356655	0.17136	0.0322896	0.473628	0.0386728	0.00680911	0.114891	0.569926	0.293632
Europe, Western	2010	sm	2.17384	1.13166	3.44516	0.341238	0.120996	0.730745	0.0759334	0.00644921	0.272839	0.24021	0.0393275	0.733184	0.34139	0.0626908	0.961082	0.0768107	0.0127122	0.234702	1.08257	0.543149	1.76763	0.0184577	0.000922524	0.0688044	0	0	0	1.09741	0.561732	1.75513	0.162759	0.0563676	0.351911	0.0454471	0.0037392	0.165599	0.106508	0.0158251	0.337307	0.176782	0.0321395	0.500982	0.0379011	0.00606819	0.117597	0.553318	0.274761
Europe, Western	2015	sm	2.26907	1.13105	3.69044	0.346761	0.11283	0.780372	0.0831087	0.00567089	0.316241	0.23779	0.0336069	0.765582	0.376254	0.0661075	1.08704	0.0802992	0.0116305	0.259608	1.12958	0.541197	1.89521	0.0189129	0.000816052	0.0726017	0	0	0	1.06211	0.518583	1.746	0.150751	0.0476656	0.343097	0.0476429	0.00319711	0.184379	0.0962106	0.0122333	0.322021	0.179471	0.0310981	0.522884	0.036956	0.00517628	0.121389	0.536257	0.2538
Europe, Western	2020	sm	2.32878	1.09237	3.90561	0.335482	0.0977002	0.802205	0.0986255	0.00530928	0.399559	0.236885	0.0277145	0.811023	0.399682	0.0660871	1.19079	0.0832886	0.0101708	0.288805	1.16036	0.522226	2.00937	0.0188453	0.000653278	0.0756145	0	0	0	1.01674	0.465424	1.72446	0.134218	0.0377747	0.324911	0.0523278	0.00275349	0.216028	0.0888224	0.00927586	0.316615	0.178049	0.0289408	0.535015	0.0357797	0.00421243	0.126098	0.514188	0.22802
North America, High Income	1990	sm	2.00593	0.938314	3.30202	0.330875	0.113716	0.698964	0.066999	0.00675778	0.235484	0.280045	0.0486718	0.831696	0.246417	0.0408025	0.719582	0.0700981	0.011419	0.218298	0.991452	0.44211	1.69297	0.0234387	0.00107	0.0887021	0	0	0	1.49173	0.687593	2.47377	0.23525	0.079421	0.501895	0.0555607	0.00548959	0.197143	0.193785	0.0315438	0.592849	0.186047	0.0303994	0.546929	0.0511398	0.00810963	0.161018	0.744232	0.329035
North America, High Income	1995	sm	1.98119	0.939567	3.24194	0.320056	0.1104	0.676424	0.0674715	0.00673562	0.237625	0.265555	0.0464342	0.790243	0.260755	0.0437912	0.756571	0.0686639	0.0114395	0.21085	0.979644	0.443524	1.66168	0.0211826	0.00102633	0.0794294	0	0	0	1.43536	0.66955	2.36735	0.222051	0.0751176	0.473803	0.0555775	0.00549363	0.197114	0.176211	0.0285908	0.541838	0.191118	0.0316166	0.558563	0.048966	0.00794411	0.152092	0.717448	0.321746
North America, High Income	2000	sm	1.94716	0.925844	3.19602	0.30412	0.103717	0.652592	0.0711281	0.0066582	0.254177	0.250554	0.0427213	0.759803	0.272296	0.045799	0.792808	0.0677914	0.0111298	0.209234	0.964437	0.438197	1.6395	0.0192693	0.000946308	0.0731114	0	0	0	1.3738	0.641938	2.27384	0.205532	0.0685753	0.44546	0.0574484	0.00539476	0.206444	0.16067	0.0252985	0.504045	0.194075	0.0321738	0.569189	0.0468703	0.00748575	0.146481	0.688083	0.309533
North America, High Income	2005	sm	1.93734	0.907546	3.16489	0.292922	0.096043	0.636367	0.0776322	0.00650511	0.283207	0.236689	0.037687	0.726389	0.287689	0.0476082	0.834236	0.0675648	0.0104955	0.210256	0.961722	0.430981	1.62594	0.0178507	0.000837661	0.0680139	0	0	0	1.32008	0.607893	2.17436	0.191359	0.061355	0.419503	0.0600061	0.00504294	0.220449	0.14692	0.0215382	0.466142	0.198379	0.032422	0.579127	0.0454308	0.00687403	0.142964	0.662387	0.293921
North America, High Income	2010	sm	2.00418	0.909956	3.30527	0.298062	0.0917401	0.666766	0.0863894	0.00627648	0.325887	0.226396	0.0321074	0.721518	0.316875	0.0508232	0.927368	0.0700255	0.00988683	0.224073	0.995888	0.432652	1.69973	0.0175418	0.000746431	0.0681695	0	0	0	1.28606	0.573676	2.1385	0.182307	0.0547451	0.411573	0.0614026	0.00439291	0.234355	0.13306	0.0173716	0.437694	0.205749	0.0325803	0.606266	0.044722	0.00615705	0.144784	0.646094	0.277845
North America, High Income	2015	sm	2.08678	0.902427	3.48892	0.297709	0.0836897	0.691508	0.0993946	0.00600246	0.390091	0.222633	0.0268023	0.740638	0.347108	0.0530991	1.02902	0.0733166	0.00903799	0.244787	1.0384	0.42966	1.7966	0.0173878	0.000636577	0.0686445	0	0	0	1.24019	0.525852	2.09008	0.167581	0.0457863	0.392863	0.0653462	0.00382838	0.260212	0.121817	0.0134636	0.417705	0.208407	0.0313598	0.622171	0.0436474	0.00523602	0.147344	0.623988	0.255102
North America, High Income	2020	sm	2.19206	0.893019	3.73686	0.299889	0.0756744	0.729375	0.113633	0.0054958	0.467726	0.220525	0.0218478	0.774748	0.379917	0.0547584	1.14878	0.0787088	0.00826599	0.278168	1.09165	0.425002	1.92681	0.017423	0.000524531	0.071028	0	0	0	1.20535	0.480515	2.07205	0.15485	0.0377949	0.380663	0.0691046	0.00318169	0.289656	0.11132	0.0101241	0.40311	0.211566	0.0299184	0.644244	0.0429102	0.00435484	0.153537	0.607164	0.233215
HIC & East and Central Europe	1990	blind	0.367019	0.150013	0.6552	0.0897734	0.0269218	0.205812	0.0114956	0.000817565	0.0459992	0.072571	0.0106461	0.237606	0.0792247	0.0129298	0.25273	0.0499083	0.00774065	0.163915	0.0475849	0.016858	0.0961872	0.0149756	0.000528097	0.0654865	0	0	0	0.277366	0.103301	0.51054	0.0682011	0.0184439	0.161601	0.00929209	0.000598851	0.0383005	0.0526903	0.00660535	0.18206	0.059956	0.00861581	0.199738	0.0371342	0.00506172	0.127692	0.0359503	0.0115918
HIC & East and Central Europe	1995	blind	0.344535	0.147471	0.603279	0.0827296	0.0256538	0.187324	0.0117846	0.000880344	0.046453	0.0663565	0.00999589	0.216127	0.0784323	0.0134379	0.244634	0.0462169	0.00747594	0.149312	0.044782	0.0166228	0.0887156	0.0128787	0.000480528	0.0546785	0	0	0	0.244553	0.0947662	0.442895	0.0584419	0.0162364	0.137318	0.00883687	0.000589896	0.0359648	0.0451653	0.00571818	0.156097	0.0559247	0.00834159	0.182965	0.032929	0.0046504	0.111673	0.0318049	0.0106814
HIC & East and Central Europe	2000	blind	0.324041	0.14319	0.55812	0.074125	0.0232686	0.16716	0.0120293	0.00088621	0.0471536	0.0602133	0.00901359	0.196561	0.0795142	0.0141994	0.241745	0.0437322	0.0071953	0.139531	0.0422304	0.0161857	0.0822322	0.0110044	0.000419061	0.0454027	0	0	0	0.215666	0.085775	0.386127	0.0492898	0.0137601	0.115916	0.00849565	0.000560657	0.0344881	0.0384062	0.00476972	0.133734	0.051621	0.00789318	0.166708	0.0289884	0.00411675	0.0979911	0.0281305	0.00970185
HIC & East and Central Europe	2005	blind	0.31229	0.138692	0.532694	0.0700043	0.0214922	0.158478	0.0118134	0.000819276	0.0461844	0.0564407	0.00796951	0.186456	0.079793	0.0142566	0.24024	0.0427838	0.00683621	0.136559	0.0407835	0.0157107	0.0786314	0.00984817	0.000363552	0.0399809	0	0	0	0.193078	0.0770181	0.342802	0.0425693	0.0115674	0.100841	0.00824922	0.000508157	0.0335795	0.0330256	0.00380933	0.116898	0.0486745	0.00743057	0.155796	0.0261081	0.00356693	0.0886644	0.0252424	0.00873288
HIC & East and Central Europe	2010	blind	0.314805	0.137649	0.539305	0.0691143	0.0200811	0.160746	0.0124009	0.000766613	0.049341	0.053894	0.00681374	0.18397	0.0852467	0.0150491	0.257093	0.0432497	0.00643631	0.141354	0.0411514	0.0156058	0.0796691	0.00921977	0.000310098	0.0374366	0	0	0	0.177619	0.0697052	0.317277	0.0382699	0.00988051	0.0930381	0.00791006	0.000432878	0.032923	0.0285343	0.0029139	0.104894	0.0473921	0.00708524	0.152579	0.0242217	0.00308006	0.0843463	0.0232584	0.00791623
HIC & East and Central Europe	2015	blind	0.315311	0.132872	0.549878	0.0666526	0.0178227	0.162058	0.0129521	0.000675659	0.0539055	0.0517284	0.00565693	0.185254	0.0905019	0.015422	0.276564	0.0430106	0.00570158	0.146074	0.0412463	0.0150722	0.0812866	0.00884349	0.000257606	0.0368581	0	0	0	0.160632	0.0604944	0.292614	0.0328708	0.00777408	0.0836166	0.00786798	0.000366961	0.0342939	0.0246123	0.00215845	0.0949905	0.0446323	0.00638501	0.14652	0.0219505	0.00248013	0.0795811	0.0210717	0.00688234
HIC & East and Central Europe	2020	blind	0.310764	0.124334	0.551663	0.0628545	0.015112	0.160269	0.014422	0.000623492	0.062159	0.0491438	0.00454439	0.184764	0.0926029	0.0149963	0.287607	0.0423258	0.00485087	0.149847	0.0407016	0.0141217	0.0816495	0.00840868	0.00020191	0.0360119	0	0	0	0.145526	0.0520238	0.268636	0.0280877	0.00597333	0.0744932	0.00797072	0.000308847	0.0360071	0.0214651	0.00157632	0.0866166	0.0420321	0.00567718	0.139863	0.019996	0.0019491	0.0752833	0.0191204	0.00592794
HIC & East and Central Europe	1990	sm	2.35876	1.05092	3.96062	0.413172	0.134597	0.897975	0.075137	0.00609459	0.287252	0.321265	0.0468235	1.02353	0.274211	0.0377089	0.89142	0.0866466	0.0117905	0.293555	1.15567	0.487583	2.02663	0.0362322	0.00127982	0.140378	0	0	0	1.83564	0.766213	3.17527	0.319428	0.0969421	0.716942	0.0620982	0.00466879	0.2443	0.238841	0.0306729	0.801401	0.216147	0.0271979	0.730725	0.0663763	0.00816858	0.233715	0.90313	0.356221
HIC & East and Central Europe	1995	sm	2.31082	1.06886	3.83578	0.396831	0.132603	0.860199	0.0793121	0.00677909	0.298919	0.305126	0.0460087	0.970878	0.282288	0.0406996	0.901929	0.082841	0.0117772	0.276392	1.1358	0.499495	1.963	0.0317144	0.00122343	0.119767	0	0	0	1.70149	0.737903	2.91569	0.287182	0.0894415	0.644521	0.0617253	0.00484538	0.240502	0.213994	0.0282079	0.71986	0.212354	0.0279063	0.708686	0.0612584	0.00786532	0.213461	0.840747	0.346374
HIC & East and Central Europe	2000	sm	2.27384	1.07246	3.75866	0.370692	0.124132	0.809824	0.085366	0.00718136	0.32251	0.289968	0.0434653	0.93179	0.299179	0.0445051	0.945007	0.0819937	0.0117636	0.272305	1.12164	0.504519	1.92548	0.0279814	0.00113276	0.104728	0	0	0	1.57779	0.696697	2.68826	0.254426	0.0790963	0.575196	0.0625746	0.00483001	0.243961	0.191083	0.0247843	0.649406	0.206865	0.027757	0.684279	0.0564779	0.00725543	0.196162	0.782857	0.329695
HIC & East and Central Europe	2005	sm	2.27693	1.07277	3.7576	0.362548	0.118591	0.802494	0.0879655	0.00679677	0.335819	0.282788	0.0405031	0.921423	0.313649	0.0467149	0.985348	0.0829296	0.0115302	0.277666	1.12602	0.506644	1.92703	0.0257215	0.00101656	0.0965371	0	0	0	1.47926	0.651833	2.51531	0.229844	0.0694072	0.527125	0.0639281	0.00455006	0.252431	0.171903	0.0209781	0.595435	0.205125	0.0275184	0.675751	0.053215	0.00656176	0.186663	0.736465	0.310233
HIC & East and Central Europe	2010	sm	2.35042	1.08617	3.91501	0.36756	0.114134	0.837248	0.0956317	0.00652577	0.374217	0.275092	0.0360349	0.925513	0.344351	0.0506392	1.08672	0.0860786	0.0111298	0.294638	1.16323	0.513204	2.00911	0.0245618	0.000911192	0.0936701	0	0	0	1.41355	0.610013	2.42527	0.214253	0.061342	0.505	0.0640444	0.00398379	0.259477	0.153805	0.0168608	0.552882	0.208051	0.0273652	0.690335	0.0512485	0.00585561	0.184203	0.705441	0.291424
HIC & East and Central Europe	2015	sm	2.42157	1.07615	4.08211	0.363065	0.103966	0.856634	0.104486	0.00591735	0.422126	0.272182	0.03108	0.950352	0.375999	0.053534	1.19609	0.088906	0.0102015	0.315455	1.19959	0.508569	2.09729	0.0240299	0.000785487	0.0932656	0	0	0	1.33844	0.551839	2.32267	0.192307	0.0502444	0.469406	0.0674213	0.00349984	0.282337	0.139397	0.013107	0.520891	0.205823	0.0259352	0.689931	0.0489406	0.0049169	0.18214	0.669817	0.264687
HIC & East and Central Europe	2020	sm	2.48015	1.03788	4.26972	0.352545	0.0903134	0.873609	0.121017	0.0055242	0.511272	0.269251	0.0256789	0.988809	0.39847	0.0539259	1.28996	0.0915095	0.0089559	0.341616	1.2304	0.490798	2.19747	0.0235349	0.000628902	0.0942419	0	0	0	1.273	0.491875	2.24984	0.171745	0.0397944	0.439073	0.0719873	0.00300414	0.315074	0.127525	0.00990128	0.500818	0.203411	0.024118	0.69387	0.0470804	0.00399297	0.184071	0.638573	0.236607
[truncated: 34 more columns]
